# Supplementary material
Source: publisher figshare collection journal article supplement (https://plos.figshare.com/articles/dataset/_/5322403)
Supplement: Supplementary file 1 [file 1]

Archive with 14 entries (14 files):
- S1 Table.pdf
- S2 Table.pdf
- S3 Table.xls
- S4 Table.pdf
- S1 Fig.eps
- S2 Fig.eps
- S3 Fig.eps
- S4 Fig.eps
- S5 Fig.eps
- S6 Fig.eps
- S7 Fig.eps
- S8 Fig.eps
- S9 Fig.eps
- S10 Fig.eps
