# Supplementary material
Source: publisher figshare collection journal article supplement (https://plos.figshare.com/articles/dataset/_/5322403)
Supplement: Supplementary file 1 [file 1 › S1 Table.pdf]

**Supplemental Table S1. Primers used in this study.**

| <b>Genome / Gene Name</b>                                    | <b>NCBI # GI #</b>                       | <b>Primer Name</b>                   | <b>Sequence (5'-3')</b>                          | <b>Product Size (bp)</b> | <b>Reference</b>                            |
|--------------------------------------------------------------|------------------------------------------|--------------------------------------|--------------------------------------------------|--------------------------|---------------------------------------------|
| <b>Ribosomal protein L8 (<i>Apis m.</i>)</b>                 | XM_393671.5<br>GI:571556074              | Rpl8Fw<br>Rpl8Rev                    | TGGATGTTCAACAGGGTTCATA<br>CTGGTGGTGGACGTATTGATAA | 121                      | Evans et al. (2006)<br>Insect Mol Bio       |
| <b>Lake Sinai virus 1 (LSV1)</b>                             | HQ871931<br>GI:335057596                 | qLSV1-F-2569<br>qLSV1-R-2743**       | AGAGGTTGCACGGCAGCATG<br>GGGACGCAGCACGATGCTCA     | 174                      | Runckel, Flenniken<br>(2011) PLoS One       |
| <b>Lake Sinai virus 2 (LSV2)</b>                             | HQ888865<br>GI:335057589                 | qLSV2-F-1722<br>qLSV2-R-1947**       | CGTGCTGAGGCCACGTTGT<br>GCGGTGTCGATCTCGCGGAC      | 225                      | Runckel, Flenniken<br>(2011) PLoS One       |
| <b>Black queen cell virus (BQCV)</b>                         | AF183905<br>GI:8100530                   | qBQCVorf2F_6664<br>qBQCVorf2R_6805   | TCCTCAAATCTGGAGCGAAC<br>GTATTCGCTGGCCGTAAC       | 141                      | Runckel, Flenniken<br>(2011) PLoS One       |
| <b>Deformed wing virus (DWV)</b>                             | AY292384.1<br>GI:31540603                | DWVfw1165<br>DWVrev1338              | CTTACTCTGCCGTCGCCA<br>CCGTTAGGAACATTATCGCG       | 173                      | Chen et al. (2005) J<br>Invert Path         |
| <b>Kashmir bee virus (KBV)</b>                               | NC_004807.1<br>GI:30793779               | KBV_F_4470<br>KBV_R_4581             | TCGACAAGGACATGATCGAG<br>GAGCCACAAATGGCTTCTTC     | 111                      | Stoltz et al. (1995)<br>J Apicult Res       |
| <b><i>Lotmaria passim</i> / (<i>Crithidia mellifica</i>)</b> | PRJNA78249<br>AHIJ01002555<br>Contig 777 | qCrFw1<br>qCrRev1                    | TCCACTCTGCAACGATGAC<br>GGGCCGAATGGAAAAGATAC      | 153                      | Runckel, Flenniken<br>(2011) PLoS One       |
| <b><i>P. larvae</i></b>                                      | PRJNA30269                               | PL2-Fw<br>PL2-Rev                    | CGGGAGACGCCAGGTTAG<br>TTCTTCCTTGCAACAGAGC        | 380                      | Marinez et al 2010;<br>Marinez et al 2011   |
| <b><i>M. plutonius</i></b>                                   | PRJDA73165                               | MelissoF<br>MelissoR                 | CAGCTAGTCGGTTTGGTTCC<br>TTGGCTGTAGATAGAATTGACAA  | 796                      | Roetschi et al 2007;<br>Roetschi et al 2008 |
| <b><i>N. ceranae</i></b>                                     | DQ673615.1<br>GI:110293152               | N ceranae F-4186<br>N ceranae R-4435 | CGGATAAAAGAGTCCGTTACC<br>TGAGCAGGGTTCTAGGGAT     | 249                      | Chen et al. (2008) J<br>Inv Path            |
