# Supplementary material
Source: publisher figshare collection journal article supplement (https://plos.figshare.com/articles/dataset/_/5322403)
Supplement: Supplementary file 1 [file 1 › S3 Table.xls]

## Sheet: SupTableS2
Supporting Table S2. Complete Data Set
Honey bee colonies from two Minnesota-based commercial beekeeping operations that transport honey bee colonies to California for almond pollination were monitored for two years from January 2014 to January 2015. At the onset of the study in January 2014, beekeepers identified 12-16 queen-right colonies that successfully overwintered (n = 28), of which two died throughout the course of the study a…
Honey bee colony population size was used as a proxy for colony health by counting the number of frames more than 2/3 covered with bees (i.e. weak < 7 frames, average = 7-12 frames, strong >12 frames covered with bees).
Pathogen diagnostics was performed by PCR (1 = positive detection, 0 = not detected, NA - not assessed or no sample) and quantitative PCR (qPCR).
Relative RNA equivalents were determined by qPCR and were natural log transformed for statistical analyses.
												Black queen cell virus			Deformed wing virus			Lotamaria passim (Crithidia mellficae, sf)			Nosema ceranae			Lake Sinai virus 1			Lake Sinai virus 2			Kashmir bee virus	Kashmir bee virus		Israeli acute paralysis virus
											BQCV PCR	BQCV qPCR	BQCV qPCR	DWV PCR	DWV qPCR	DWV qPCR	Lm PCR	Lm qPCR	Lm qPCR	Nc PCR	Nc qPCR	Nc qPCR	LSV1 PCR	LSV1 qPCR	LSV1 qPCR	LSV2 PCR	LSV2 qPCR	LSV2 qPCR	KBV PCR	KBV qPCR	KBV qPCR	IAPV PCR	IAPV qPCR	IAPV qPCR
Sample Number	Beekeeping Operation	Unique Colony Identifier	Colony Designation	Colony Strength Rating (Weak, Average, Strong)	Frame Count	Sampling Event Designation	Day of Year	Month	Day	Year	Pathogen 1 Presence	Pathogen 1 qPCR relative RNA equivalents	Pathogen 1 Abundance (ln)	Pathogen 2 Presence	Pathogen 2 qPCR relative RNA equivalents	Pathogen 2 Abundance (ln)	Pathogen 3 Presence	Pathogen 3 qPCR relative RNA equivalents	Pathogen 3 Abundance (ln)	Pathogen 4 Presence	Pathogen 4 qPCR relative RNA equivalents	Pathogen 4 Abundance (ln)	Pathogen 5 Presence	Pathogen 5 qPCR relative RNA equivalents	Pathogen 5 Abundance (ln)	Pathogen 6 Presence	Pathogen 6 qPCR relative RNA equivalents	Pathogen 6 Abundance (ln)	Pathogen 7 Presence	Pathogen 7 qPCR relative RNA equivalents	Pathogen 7 Abundance (ln)	Pathogen 8 Presence	Pathogen 8 qPCR relative RNA equivalents	Pathogen 8 Abundance (ln)	Number of Varroa mites per 100 bees	Total Pathogen Abundance (ln sum)	Sum Pathogen Prevalence	Colony status at end of study Jan. 2015
1	Operation1	O1-11	11	W	5	January	27	1	27	2014	1	886.55	6.78734	0	0	0	1	897	6.79906	0	0	0	1	177927	12.0891	1	900	6.80239	0	0	0	0	0	0	0	12.1041	4	alive
2	Operation1	O1-12	12	A	7	January	27	1	27	2014	1	1377	7.22766	0	0	0	1	683	6.52649	1	208	5.33754	0	0	0	1	473	6.1591	0	0	0	0	0	0	1	7.91608	4	died
3	Operation1	O1-13	13	A	7	January	27	1	27	2014	1	8198.31	9.01168	0	0	0	1	1654	7.41095	1	1664	7.41698	1	2218	7.70436	1	2211	7.7012	0	0	0	0	0	0	0	9.67692	5	alive
4	Operation1	O1-14	14	A	8	January	27	1	27	2014	1	524.28	6.26203	0	0	0	1	605	6.40523	0	0	0	1	490	6.19441	1	400	5.99146	0	0	0	0	0	0	0	7.6105	4	died
5	Operation1	O1-31	31	A	10	January	27	1	27	2014	1	19541.7	9.88031	0	0	0	1	865	6.76273	0	0	0	1	5877	8.6788	1	498	6.2106	0	0	0	0	0	0	0	10.1955	4	alive
6	Operation1	O1-32	32	A	9	January	27	1	27	2014	1	18202.1	9.80929	0	0	0	1	1030	6.93731	0	0	0	1	3797	8.24197	1	464	6.13988	0	0	0	0	0	0	0	10.0645	4	alive
7	Operation1	O1-33	33	A	7	January	27	1	27	2014	1	550932	13.2194	0	0	0	1	585	6.37161	0	0	0	0	0	0	1	255	5.54126	0	0	0	0	0	0	0	13.2209	3	died
8	Operation1	O1-34	34	A	8	January	27	1	27	2014	1	19363.2	9.87113	0	0	0	1	1862	7.52941	0	0	0	1	3615	8.19285	1	527	6.2672	0	0	0	0	0	0	0	10.1412	4	died
9	Operation1	O1-41	41	S	13	January	27	1	27	2014	1	132640	11.7954	0	0	0	1	916	6.82002	1	4	1.38629	1	2964	7.99429	1	2344	7.75961	0	0	0	0	0	0	0	11.8413	5	died
10	Operation1	O1-42	42	S	13	January	27	1	27	2014	1	8253.52	9.0184	0	0	0	1	1.204e+08	18.6063	1	17	2.83321	1	2457	7.8067	1	430	6.06379	0	0	0	0	0	0	0	18.6064	5	alive
11	Operation1	O1-43	43	A	10	January	27	1	27	2014	1	3946.42	8.28056	0	0	0	1	4.66145e+07	17.6574	1	21962	9.99707	1	2913	7.97694	1	432	6.06843	0	0	0	0	0	0	1	17.658	5	died
12	Operation1	O1-44	44	A	11	January	27	1	27	2014	1	6148.77	8.72401	0	0	0	1	6292	8.74703	0	0	0	1	4423	8.39457	1	266	5.5835	0	0	0	0	0	0	0	9.74857	4	alive
13	Operation1	O1-51	51	W	6	January	27	1	27	2014	1	43349.4	10.677	0	0	0	1	29473	10.2912	0	0	0	1	11019	9.30738	1	230	5.43808	0	0	0	0	0	0	0	11.3394	4	died
14	Operation1	O1-52	52	A	10	January	27	1	27	2014	1	20931.3	9.949	0	0	0	1	1001	6.90875	1	5	1.60944	1	8052	8.99368	1	308	5.7301	0	0	0	0	0	0	0	10.3188	5	died
15	Operation1	O1-53	53	A	9	January	27	1	27	2014	1	6742.56	8.81619	0	0	0	1	1440	7.2724	1	44	3.78419	1	26453	10.1831	1	265	5.57973	0	0	0	0	0	0	0	10.4615	5	died
16	Operation1	O1-54	54	A	9	January	27	1	27	2014	1	11469.1	9.34741	0	0	0	1	1644	7.40489	1	57	4.04305	1	106	4.66344	1	705	6.5582	0	0	0	0	0	0	0	9.54546	5	alive
17	Operation2	O2-21	21	A	9	January	29	1	29	2014	1	1.03659e+06	13.8514	0	0	0	1	799	6.68336	1	24	3.17805	1	11287	9.33141	1	1078	6.98286	1	482	6.17794	0	0	0	2	13.8645	6	died
18	Operation2	O2-22	22	A	9	January	29	1	29	2014	1	1677.14	7.42485	0	0	0	1	748	6.6174	0	0	0	1	4289	8.36381	1	609	6.41182	1	459	6.12905	0	0	0	1	8.95959	5	alive
19	Operation2	O2-23	23	A	8	January	29	1	29	2014	1	2450.34	7.80398	0	0	0	1	1974	7.58782	1	53	3.97029	1	36988	10.5183	1	1.85105e+06	14.4313	1	1088	6.9921	0	0	0	0	14.454	6	alive
20	Operation2	O2-24	24	A	9	January	29	1	29	2014	1	18923.5	9.84816	0	0	0	1	534	6.2804	1	32	3.46574	1	9500	9.15905	1	476	6.16542	1	289	5.66643	0	0	0	1	10.3007	6	alive
21	Operation2	O2-31	31	S	13	January	29	1	29	2014	1	2210.61	7.70102	0	0	0	1	1227	7.11233	1	122	4.80402	1	1545	7.34278	1	1.4731e+06	14.2029	1	1083	6.98749	0	0	0	0	14.2071	6	died
22	Operation2	O2-32	32	W	5	January	29	1	29	2014	1	16277.3	9.69753	0	0	0	1	1347	7.20564	1	51	3.93183	1	19071	9.85592	1	1386	7.23418	1	342913	12.7452	0	0	0	0	12.8507	6	died
23	Operation2	O2-33	33	A	10	January	29	1	29	2014	1	1443.61	7.2749	0	0	0	1	870	6.76849	1	27	3.29584	1	10517	9.26075	1	670	6.50728	1	735	6.59987	0	0	0	0	9.5654	6	died
24	Operation2	O2-34	34	A	10	January	29	1	29	2014	1	2081.27	7.64073	0	0	0	1	1614	7.38647	1	83	4.41884	1	4037	8.30326	1	1228	7.11314	1	1852	7.52402	0	0	0	2	9.29608	6	alive
25	Operation2	O2-41	41	A	12	January	29	1	29	2014	1	1189.57	7.08135	0	0	0	1	1006	6.91374	0	0	0	1	22550	10.0235	1	953	6.85961	1	701	6.55251	0	0	0	2	10.1811	5	died
26	Operation2	O2-42	42	A	8	January	29	1	29	2014	1	10974.9	9.30337	0	0	0	1	845	6.73934	1	30	3.4012	1	9857	9.19594	1	823	6.71296	1	733	6.59715	0	0	0	0	10.0546	6	alive
27	Operation2	O2-43	43	A	7	January	29	1	29	2014	1	10514.9	9.26054	0	0	0	1	2085	7.64252	1	51	3.93183	1	16912	9.73578	1	2220	7.70526	1	1499	7.31255	0	0	0	0	10.4128	6	died
28	Operation2	O2-44	44	S	14	January	29	1	29	2014	1	4015.9	8.29802	0	0	0	1	2303	7.74197	1	852	6.74759	1	3352	8.11731	1	10201	9.23024	1	2389	7.77863	0	0	0	2	10.0481	6	died
29	Operation1	O1-11	11	S	14	March	62	3	3	2014	1	8458.96	9.04298	0	0	0	1	5.60807e+06	15.5397	1	33491	10.419	1	1.85949e+08	19.041	1	467	6.14633	0	0	0	0	0	0	0	19.0709	5
30	Operation1	O1-12	12	S	15	March	62	3	3	2014	1	47695.4	10.7726	0	0	0	1	6.87952e+06	15.7441	1	215894	12.2825	1	1.23808e+08	18.6342	1	3054	8.02421	0	0	0	0	0	0	1	18.6904	5
31	Operation1	O1-13	13	S	13	March	62	3	3	2014	1	36256.2	10.4984	0	0	0	1	6.74791e+06	15.7247	1	21744	9.98709	1	6.29359e+06	15.655	1	5235	8.56312	0	0	0	0	0	0	1	16.3885	5
32	Operation1	O1-14	14	S	16	March	62	3	3	2014	1	17981.6	9.7971	0	0	0	1	62441	11.042	1	1182	7.07496	1	31439	10.3558	1	6.67394e+08	20.3189	0	0	0	0	0	0	0	20.3191	5
33	Operation1	O1-31	31	S	14	March	62	3	3	2014	1	55759.5	10.9288	0	0	0	1	10292	9.23912	1	39291	10.5788	1	4460	8.4029	1	10772	9.28471	0	0	0	0	0	0	0	11.7	5
34	Operation1	O1-32	32	S	15	March	62	3	3	2014	1	174571	12.0701	0	0	0	1	7.26983e+07	18.1018	1	297	5.69373	1	8773	9.07943	1	6520	8.78263	0	0	0	0	0	0	1	18.1044	5
35	Operation1	O1-33	33	A	10	March	62	3	3	2014	1	18406.3	9.82045	0	0	0	1	1.03899e+06	13.8538	1	37380	10.5289	1	1.61206e+06	14.293	1	2942	7.98684	0	0	0	0	0	0	0	14.8124	5
36	Operation1	O1-34	34	S	13	March	62	3	3	2014	1	242919	12.4005	0	0	0	1	1.21779e+06	14.0125	1	96973	11.4822	1	6102	8.71637	1	4450	8.40066	0	0	0	0	0	0	0	14.2655	5
37	Operation1	O1-41	41	S	17	March	62	3	3	2014	1	336180	12.7254	0	0	0	1	3.73369e+06	15.1329	1	64627	11.0764	1	3206	8.07278	1	17367	9.76233	0	0	0	0	0	0	0	15.2398	5
38	Operation1	O1-42	42	S	16	March	62	3	3	2014	1	1.72684e+07	16.6644	0	0	0	1	2.29922e+07	16.9507	1	78501	11.2709	1	237	5.46806	1	1912	7.55591	0	0	0	0	0	0	0	17.5129	5
39	Operation1	O1-43	43	A	12	March	62	3	3	2014	1	3.54842e+07	17.3846	0	0	0	1	1176	7.06987	1	138	4.92725	1	41070	10.623	1	2.05239e+08	19.1397	0	0	0	0	0	0	3	19.2993	5
40	Operation1	O1-44	44	S	15	March	62	3	3	2014	1	13175.6	9.48612	0	0	0	1	7285	8.89357	1	300	5.70378	1	4943	8.50573	1	2703	7.90212	0	0	0	0	0	0	1	10.2544	5
41	Operation1	O1-51	51	W	5	March	62	3	3	2014	1	4.44395e+07	17.6096	0	0	0	1	460469	13.04	1	145	4.97673	1	15008	9.61634	1	6918	8.84188	0	0	0	0	0	0	0	17.6204	5	died
42	Operation1	O1-52	52	S	16	March	62	3	3	2014	1	65155.1	11.0845	0	0	0	1	7.78311e+06	15.8675	1	72751	11.1948	1	4988	8.51479	1	979	6.88653	0	0	0	0	0	0	1	15.8858	5	alive
43	Operation1	O1-53	53	S	17	March	62	3	3	2014	1	1.85319e+07	16.735	0	0	0	1	41227	10.6268	1	19166	9.86089	1	1.20922e+08	18.6107	1	1341	7.20117	0	0	0	0	0	0	0	18.7537	5	alive
44	Operation1	O1-54	54	S	15	March	62	3	3	2014	1	9436.33	9.15232	0	0	0	1	5.3152e+06	15.4861	1	186	5.22575	1	4338	8.37517	1	603	6.40192	0	0	0	0	0	0	0	15.4888	5	died
45	Operation2	O2-21	21	S	16	March	73	3	14	2014	1	9430.51	9.15171	0	0	0	1	914780	13.7264	1	7428	8.91301	0	0	0	1	12709	9.45007	1	175	5.16479	0	0	0	2	13.7584	5
46	Operation2	O2-22	22	A	9	March	73	3	14	2014	1	1724.6	7.45275	0	0	0	1	675	6.51471	1	50	3.91202	1	5.38857e+07	17.8024	1	1551	7.34666	1	245	5.50126	0	0	0	0	17.8025	6
47	Operation2	O2-23	23	A	9	March	73	3	14	2014	1	1771.36	7.4795	0	0	0	1	1016	6.92363	1	54	3.98898	1	1561	7.35308	1	1678	7.42536	1	1012	6.91968	0	0	0	0	8.86677	6
48	Operation2	O2-24	24	S	14	March	73	3	14	2014	1	1834.72	7.51465	0	0	0	1	2422	7.79235	1	96	4.56435	1	8786	9.08091	1	1422	7.25982	1	643	6.46614	0	0	0	0	9.6293	6
49	Operation2	O2-31	31	S	14	March	73	3	14	2014	1	774415	13.5599	0	0	0	1	2466	7.81035	1	63493	11.0587	1	1117	7.0184	1	1386	7.23418	1	759	6.632	0	0	0	0	13.6455	6
50	Operation2	O2-32	32	W	6	March	73	3	14	2014	1	31618.5	10.3615	0	0	0	1	1035	6.94216	1	240	5.48064	1	3.9442e+08	19.7929	1	1157	7.05359	1	628	6.44254	0	0	0	1	19.793	6
51	Operation2	O2-33	33	S	15	March	73	3	14	2014	1	4263.46	8.35784	0	0	0	1	2213	7.7021	1	15344	9.63848	1	9913	9.2016	1	1407	7.24922	1	1084	6.98841	0	0	0	1	10.4407	6
52	Operation2	O2-34	34	A	11	March	73	3	14	2014	1	2348.9	7.7617	0	0	0	1	1527	7.33106	1	5	1.60944	1	1689	7.43189	1	1334	7.19594	1	956	6.86276	0	0	0	0	8.96953	6
53	Operation2	O2-41	41	S	16	March	62	3	3	2014	1	971187	13.7863	0	0	0	1	14367	9.57269	1	22505	10.0215	1	5673	8.64347	1	294065	12.5916	1	774	6.65157	0	0	0	1	14.0844	6
54	Operation2	O2-42	42	A	9	March	62	3	3	2014	1	245837	12.4124	0	0	0	1	882	6.78219	0	0	0	1	756	6.62804	1	2033	7.61727	1	214	5.36598	0	0	0	0	12.4281	5
55	Operation2	O2-43	43	W	2	March	62	3	3	2014	1	415609	12.9375	0	0	0	1	171353	12.0515	1	357	5.87774	1	5442	8.6019	1	2695	7.89915	1	1732	7.45703	0	0	0	0	13.3	6
56	Operation2	O2-44	44	S	15	March	62	3	3	2014	1	6445.08	8.77107	0	0	0	1	542822	13.2045	1	30535	10.3266	1	1988	7.59488	1	2277	7.73061	1	274	5.61313	0	0	0	0	13.2782	6
57	Operation2	O2-21	21	D	0	June	160	6	9	2014	1	1.44394e+06	14.1829	1	5.66441e+07	17.8523	1	19	2.94444	1	11977	9.39074	1	1796	7.49332	1	1756	7.47079	1	68915	11.1406	0	0	0	28	17.8789	8
58	Operation2	O2-22	22	A	10	June	160	6	9	2014	1	2007.75	7.60477	1	2.18744e+07	16.9008	1	337	5.82008	1	42443	10.6559	1	11698	9.36717	1	1597	7.37588	1	2955	7.99125	0	0	0	10	16.9036	8
59	Operation2	O2-23	23	S	8	June	160	6	9	2014	1	860.27	6.75725	1	5199	8.55622	1	105	4.65396	0	0	0	1	22360	10.015	1	578	6.35957	1	1085	6.98934	0	0	0	3	10.3152	6
60	Operation2	O2-24	24	S	9	June	160	6	9	2014	1	1.33846e+06	14.107	1	23952	10.0838	1	85	4.44265	1	321	5.77144	1	57238	10.955	1	3338	8.11313	1	660	6.49224	0	0	0	5	14.169	8
61	Operation2	O2-31	31	S	9	June	160	6	9	2014	1	1033.85	6.94104	0	0	0	1	21	3.04452	0	0	0	1	4387	8.3864	1	437	6.07993	1	1086	6.99026	0	0	0	2	8.84863	5
62	Operation2	O2-32	32	S	13	June	160	6	9	2014	1	444583	13.0049	1	2357	7.76514	1	76	4.33073	1	297683	12.6038	1	3.64522e+06	15.1089	1	2375	7.77275	1	1647	7.40671	0	0	0	1	15.2957	7
63	Operation2	O2-33	33	S	7	June	160	6	9	2014	1	26162.3	10.1721	1	1832	7.51316	1	51	3.93183	1	177360	12.0859	1	337356	12.7289	1	838538	13.6394	1	1.40294e+07	16.4567	0	0	0	1	16.5506	7
64	Operation2	O2-34	34	S	9	June	160	6	9	2014	1	275.03	5.61688	1	721	6.58064	1	24	3.17805	0	0	0	1	802	6.68711	1	81	4.39445	1	235	5.45959	0	0	0	1	7.66764	6
65	Operation2	O2-41	41	S	10	June	160	6	9	2014	1	3337.4	8.11295	1	6386	8.76186	1	29	3.3673	1	112428	11.6301	1	3035	8.01797	1	1719	7.4495	1	8703	9.07142	0	0	0	3	11.8177	7
66	Operation2	O2-42	42	S	7	June	160	6	9	2014	1	1.07529e+06	13.8881	1	238	5.47227	1	56	4.02535	1	19026	9.85356	1	4491	8.40983	1	1712	7.44542	1	145015	11.8846	0	0	0	1	14.0353	7
67	Operation2	O2-44	44	S	14	June	160	6	9	2014	1	2658.98	7.8857	1	67670	11.1224	1	60	4.09434	0	0	0	1	2774	7.92805	1	859	6.75577	1	947	6.8533	0	0	0	18	11.2248	7
68	Operation2	O2-21	21	A	2	August	237	8	25	2014	1	1.73406e+08	18.9711	1	4.1424e+08	19.842	0	0	0	1	2906	7.97453	1	7389	8.90775	1	37	3.61092	0	0	0	1	NA	0	19	20.1917	7
69	Operation2	O2-22	22	A	11	August	237	8	25	2014	1	62042.4	11.0356	1	6.26347e+06	15.6502	0	0	0	0	0	0	1	71032	11.1709	1	33	3.49651	0	0	0	0	0	0	15	15.6713	6
70	Operation2	O2-23	23	S	4	August	237	8	25	2014	1	57153.7	10.9535	1	8531	9.05146	0	0	0	1	17641	9.77798	1	1.60382e+06	14.2879	1	149	5.00395	0	0	0	0	0	0	1	14.3386	6
71	Operation2	O2-24	24	S	5	August	237	8	25	2014	1	1.18643e+06	13.9865	1	17689	9.7807	0	0	0	1	27	3.29584	1	2165	7.68018	0	1	0	0	0	0	0	0	0	21	14.0031	6
72	Operation2	O2-31	31	W	2	August	237	8	25	2014	1	28814.8	10.2686	1	5.13287e+07	17.7538	0	0	0	1	86	4.45435	1	117243	11.672	1	24	3.17805	0	0	0	0	0	0	5	17.7566	7
73	Operation2	O2-32	32	S	15	August	237	8	25	2014	1	272963	12.5171	1	25435	10.1439	0	0	0	1	78	4.35671	1	1.11418e+08	18.5288	1	277	5.62402	0	0	0	0	0	0	6	18.5315	7
74	Operation2	O2-34	34	S	16	August	237	8	25	2014	1	5.05243e+06	15.4354	1	3155	8.05674	0	0	0	0	0	0	1	15080	9.62112	1	95	4.55388	0	0	0	0	0	0	7	15.439	6
75	Operation2	O2-41	41	A	3	August	237	8	25	2014	1	18582.2	9.82996	1	1.18026e+06	13.9812	0	0	0	1	26772	10.1951	1	7947	8.98055	0	1	0	0	0	0	0	0	0	4	14.0254	6
76	Operation2	O2-42	42	S	15	August	237	8	25	2014	1	30118.4	10.3129	1	20740	9.93982	0	0	0	1	410	6.01616	1	11123	9.31677	1	1921	7.5606	0	0	0	0	0	0	0	11.0715	6
77	Operation2	O2-44	44	S	11	August	237	8	25	2014	1	24277.2	10.0973	1	1.09674e+08	18.513	0	0	0	1	39	3.66356	1	2731	7.91242	1	408	6.01127	0	0	0	0	0	0	26	18.5133	7
78	Operation2	O2-51	51	S	17	August	237	8	25	2014	1	64598.3	11.0759	1	1.26139e+08	18.6529	0	0	0	1	18564	9.82898	0	0	0	1	1265	7.14283	0	0	0	0	0	0	7	18.6536	6
79	Operation2	O2-52	52	S	17	August	237	8	25	2014	1	6.63513e+06	15.7079	1	7.64096e+06	15.849	0	0	0	1	161	5.0814	1	818	6.70686	1	891	6.79234	0	0	0	0	0	0	3	16.4742	6
80	Operation2	O2-53	53	S	18	August	237	8	25	2014	1	1.50217e+06	14.2224	1	1.58874e+06	14.2785	0	0	0	1	62	4.12713	1	3555	8.17611	0	1	0	0	0	0	0	0	0	10	14.9451	6
81	Operation2	O2-54	54	S	14	August	237	8	25	2014	1	151755	11.93	1	7.3502e+06	15.8102	0	0	0	1	2510	7.82804	1	38419	10.5563	1	63	4.14313	0	0	0	0	0	0	11	15.8361	7
82	Operation1	O1-11	11	A	11	September	245	9	2	2014	1	354304	12.7779	1	2.09849e+07	16.8593	1	423	6.04737	1	2376	7.77317	0	0	0	1	1587	7.3696	0	0	0	0	0	0	1	16.8763	5
83	Operation1	O1-12	12	A	13	September	245	9	2	2014	1	6.22191e+06	15.6436	1	1.71555e+06	14.3552	1	23	3.13549	1	133	4.89035	1	25786	10.1576	1	35484	10.4768	0	0	0	0	0	0	7	15.8948	7
84	Operation1	O1-13	13	A	11	September	245	9	2	2014	1	7.15725e+07	18.0862	1	1.11092e+07	16.2233	1	70	4.2485	1	50	3.91202	0	0	0	1	1289	7.16162	0	0	0	0	0	0	7	18.2305	6
85	Operation1	O1-14	14	S	17	September	245	9	2	2014	1	59417.7	10.9923	1	4.61401e+06	15.3446	1	28	3.3322	1	92	4.52179	0	0	0	1	1025	6.93245	0	0	0	0	0	0	3	15.3576	5
86	Operation1	O1-31	31	S	13	September	245	9	2	2014	1	1.59253e+07	16.5834	1	152812	11.937	1	2.08502e+06	14.5503	1	161	5.0814	0	0	0	1	2.15406e+06	14.5829	0	0	0	0	0	0	6	16.827	6
87	Operation1	O1-32	32	S	15	September	245	9	2	2014	1	15562.1	9.65259	1	14889	9.60838	1	6751	8.81745	1	17313	9.75921	0	0	0	1	1276	7.15149	0	0	0	0	0	0	4	10.9294	6
88	Operation1	O1-41	41	W	3	September	245	9	2	2014	1	1.12922e+08	18.5422	1	25685	10.1537	1	29	3.3673	1	185	5.22036	0	0	0	1	313	5.7462	0	0	0	0	0	0	2	18.5424	5
89	Operation1	O1-42	42	S	16	September	245	9	2	2014	1	22333.1	10.0138	1	1.4442e+06	14.1831	1	46	3.82864	1	6	1.79176	0	0	0	1	54	3.98898	0	0	0	0	0	0	10	14.1985	6
90	Operation1	O1-44	44	S	15	September	245	9	2	2014	1	25640.7	10.1519	1	145652	11.889	1	415	6.02828	1	65	4.17439	1	1688	7.4313	1	209	5.34233	0	0	0	0	0	0	4	12.0649	7
91	Operation1	O1-51	51	D	0	September	245	9	2	2014	1	25596	10.1502	1	15311	9.63633	1	2408	7.78655	1	70	4.2485	0	0	0	1	2.588e+06	14.7664	0	0	0	0	0	0	0	14.783	5
92	Operation1	O1-54	54	S	14	September	245	9	2	2014	1	12708.6	9.45003	1	1.02329e+07	16.1411	1	67	4.20469	1	265	5.57973	1	2102	7.65064	1	79	4.36945	0	0	0	0	0	0	6	16.1426	7
